# Supplementary material for: In Vivo Knockout of the Vegfa Gene by Lentiviral Delivery of CRISPR/Cas9 in Mouse Retinal Pigment Epithelium Cells
Source: PubMed Central journal article supplement — Mol Ther Nucleic Acids. 2017 Sep 21;9:89–99. doi: 10.1016/j.omtn.2017.08.016 (PMC5626917; doi:10.1016/j.omtn.2017.08.016), 2017-09-21
Supplement: mmc1.pdf [file mmc1.pdf]

OMTN, Volume 9

## Supplemental Information

### **In Vivo Knockout of the *Vegfa* Gene by Lentiviral Delivery of CRISPR/Cas9 in Mouse Retinal Pigment Epithelium Cells**

**Andreas Holmgaard, Anne Louise Askou, Josephine Natalia Esther Benckendorff, Emil Aagaard Thomsen, Yujia Cai, Toke Bek, Jacob Giehm Mikkelsen, and Thomas J. Corydon**

**a**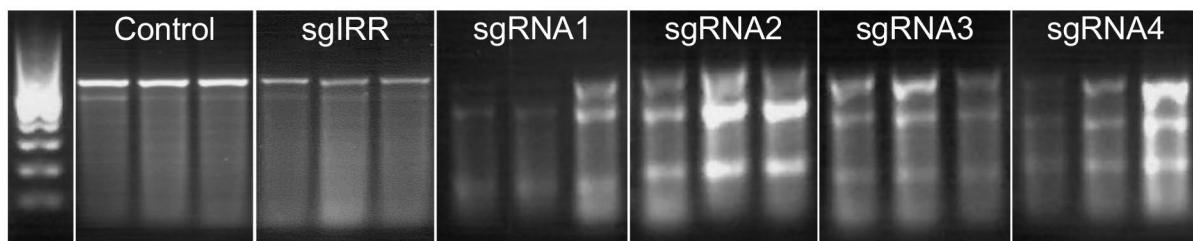**b**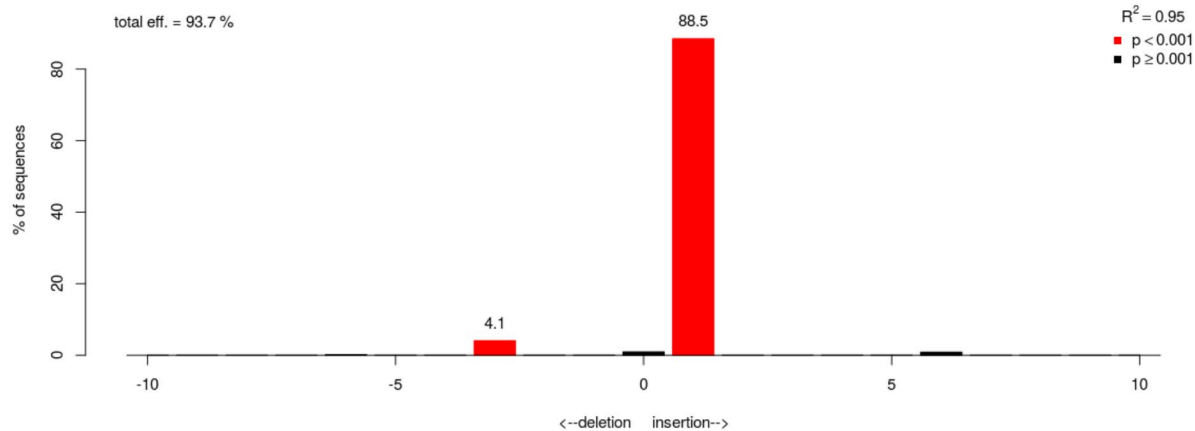**c**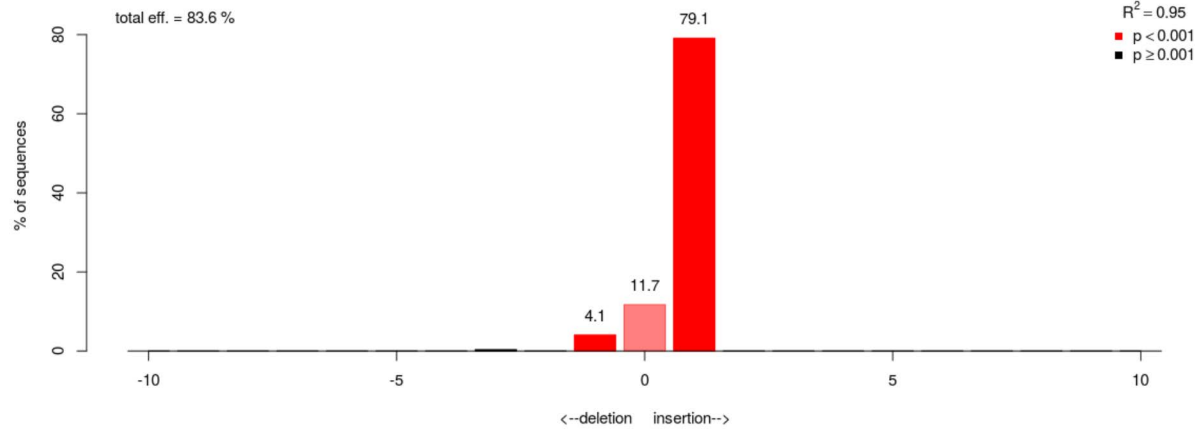

**Supplementary Figure 1 Analysis of genomic knockout.** (a) Surveyor Nuclease Assay gel electrophoresis performed on gDNA from LV/Cas9-sgRNA(1-4)- and LV/Cas9-sgRNA-Irr- transduced HEK293-VEGFA cells. Non-transduced cells were used as control. Results from the quantification of the resulting DNA fragments are presented in Figure 1e (black columns). (b) Representative TIDE analysis of gDNA from LV/Cas9-sgRNA3 transduced HEK293-VEGFA cells. The results from the TIDE analysis of all the investigated LV/Cas9-sgRNAs are shown in Figure 1e (white columns). (c) TIDE analysis of FACS-sorted eGFP-positive LV/Cas9-sgRNA3 transduced RPE cells corresponding to the TIDE knockout score presented Figure 4e.

**Supplementary Table 1 Designed single guide RNAs.** Calculated on-target score assessed by Broad Institute and off-target score estimated by CRISPR Design (0-100 score). sgRNA1 and sgRNA4 were chosen based on high off-target and above-average on-target scores. sgRNA2 and sgRNA3 were selected based on highest possible on-target score. Primary selection criteria marked in bold. Sequences are shown in 5'-3' orientation.

| Name      | Sequence             | Broad Institute | CRISPR Design |
|-----------|----------------------|-----------------|---------------|
| sgRNA1    | TCGGACGGCAGTAGCTTCGC | 53,6            | <b>96</b>     |
| sgRNA2    | CCGTCCGATTGAGACCCTGG | <b>71,5</b>     | 89            |
| sgRNA3    | CTCCTGGAAGATGTCCACCA | <b>75,3</b>     | 55            |
| sgRNA4    | AAGATGTACTCTATCTCGTC | 69,5            | <b>95</b>     |
| sgRNA-Irr | ACGGAGGCTAAGCGTCGCAA | -               | -             |

**Supplementary Table 2 Primers used for PCR amplification.** For *in vitro* investigation of indel formation in HEK293-VEGFA cells, mVEGFA-forward and mVEGFA-reverse primers (No 1 and 2) were used to amplify the cDNA construct of the murine *Vegfa* gene. Following purification of genomic DNA from FACS sorted RPE cells, mExon3-forward and mExon3-reverse primers (No 3 and 4) were used to amplify exon 3 of the murine *Vegfa* gene for TIDE and TOPO cloning analyzes. Sequences are shown in 5'-3' orientation.

| No | Name           | Sequence                  |
|----|----------------|---------------------------|
| 1  | mVEGFA-forward | ATGAACTTTCTGCTCTCTTG      |
| 2  | mVEGFA-reverse | CCTTGGCTTGTCACATCT        |
| 3  | mExon3-forward | AAAGGTCACGAAAGCAGATGGTCAA |
| 4  | mExon3-reverse | GTGTATATACATAGCTGTCCCCGGT |
